# Supplementary material for: Patterns of Immune Activation in HIV and Non HIV Subjects and Its Relation to Cardiovascular Disease Risk
Source: PubMed Central journal article supplement (PMC8287326; doi:10.3389/fimmu.2021.647805), 2021-07-05
Supplement: DataSheet_1.pdf [file DataSheet_1.pdf]

| <b>Overview</b> | <b>Inflammation markers included in the Olink 'inflammation' panel</b> |
|-----------------|------------------------------------------------------------------------|
| 4E-BP1          | Eukaryotic translation initiation factor 4E-binding protein 1          |
| ADA             | Adenosine Deaminase                                                    |
| ARTN            | Artemin                                                                |
| AXIN1           | Axin-1                                                                 |
| Beta-NGF        | Beta-nerve growth factor                                               |
| CASP8           | Caspase-8                                                              |
| CCL3            | C-C motif chemokine 3                                                  |
| CCL4            | C-C motif chemokine 4                                                  |
| CCL11           | Eotaxin                                                                |
| CCL19           | C-C motif chemokine 19                                                 |
| CCL20           | C-C motif chemokine 20                                                 |
| CCL23           | C-C motif chemokine 23                                                 |
| CCL25           | C-C motif chemokine 25                                                 |
| CCL28           | C-C motif chemokine 28                                                 |
| CD244           | Natural killer cell receptor 2B4                                       |
| CD40            | CD40L receptor                                                         |
| CD5             | T-cell surface glycoprotein                                            |
| CD6             | T-cell surface glycoprotein CD6 isoform                                |
| CD8A            | T-cell surface glycoprotein CD8 alpha chain                            |
| CDCP1           | CUB domain-containing protein 1                                        |
| CSF1            | Macrophage colony-stimulating factor 1                                 |
| CST5            | Cystatin D                                                             |
| CX3CL1          | Fractalkine                                                            |
| CXCL1           | C-X-C motif chemokine 1                                                |
| CXCL5           | C-X-C motif chemokine 5                                                |
| CXCL6           | C-X-C motif chemokine 6                                                |
| CXCL9           | C-X-C motif chemokine 9                                                |
| CXCL10          | C-X-C motif chemokine 10                                               |
| CXCL11          | C-X-C motif chemokine 11                                               |
| DNER            | Delta and Notch-like epidermal growth factor-related receptor          |
| EN-RAGE         | Protein S100-A12                                                       |
| FGF19           | Fibroblast growth factor 19                                            |
| FGF21           | Fibroblast growth factor 21                                            |
| FGF23           | Fibroblast growth factor 23                                            |
| FGF5            | Fibroblast growth factor 5                                             |
| Flt3L           | Fms-related tyrosine kinase 3 ligand                                   |
| GDNF            | Glial cell line-derived neurotrophic factor                            |
| HGF             | Hepatocyte growth factor                                               |
| IFN-gamma       | Interferon gamma                                                       |
| IL1alpha        | Interleukin-1 alpha                                                    |
| IL2             | Interleukin-2                                                          |
| IL2RB           | Interleukin-2 receptor subunit beta                                    |
| IL4             | Interleukin-4                                                          |
| IL5             | Interleukin-5                                                          |
| IL6             | Interleukin-6                                                          |
| IL7             | Interleukin-7                                                          |
| IL8             | Interleukin-8                                                          |

|             |                                                              |
|-------------|--------------------------------------------------------------|
| IL10        | Interleukin-10                                               |
| IL10RA      | Interleukin-10 receptor subunit alpha                        |
| IL10RB      | Interleukin-10 receptor subunit beta                         |
| IL12B       | Interleukin-12 subunit beta                                  |
| IL13        | Interleukin 13                                               |
| IL15RA      | Interleukin-15 receptor subunit alpha                        |
| IL17A       | Interleukin 17A                                              |
| IL17C       | Interleukin 17C                                              |
| IL18        | Interleukin 18                                               |
| IL18R1      | Interleukin-18 receptor 1                                    |
| IL20        | Interleukin-20                                               |
| IL20RA      | Interleukin-20 receptor subunit alpha                        |
| IL22RA1     | Interleukin-22 receptor subunit alpha-1                      |
| IL24        | Interleukin-24                                               |
| IL33        | Interleukin-33                                               |
| LAPTGFbeta1 | Latency-associated peptide transforming growth factor beta-1 |
| LIF         | Leukemia inhibitory factor                                   |
| LIFR        | leukemia inhibitory factor receptor                          |
| MCP1        | Monocyte chemotactic protein-1                               |
| MCP2        | Monocyte chemotactic protein-2                               |
| MCP3        | Monocyte chemotactic protein-3                               |
| MCP4        | Monocyte chemotactic protein-4                               |
| MMP1        | Matrix metalloproteinase-1                                   |
| MMP10       | Matrix metalloproteinase-10                                  |
| NRTN        | Neurturin                                                    |
| NT3         | Neurotrophin-3                                               |
| OPG         | Osteoprotegerin                                              |
| OSM         | Oncostatin-M                                                 |
| PDL1        | Programmed cell death 1 ligand 1                             |
| SCF         | Stem cell factor                                             |
| SIRT2       | SIR2-like protein                                            |
| SLAMF1      | Signaling lymphocyte activation molecule family 1            |
| ST1A1       | Sulfotransferase 1A1                                         |
| STAMBP      | STAM-binding protein                                         |
| TGF-alpha   | Transforming growth factor alpha                             |
| TNF         | tumor necrosis factor                                        |
| TNFB        | tumor necrosis factor-beta                                   |
| TNFRSF9     | tumor necrosis factor receptor superfamily member 9          |
| TNFSF14     | tumor necrosis factor ligand superfamily member 14           |
| TRAIL       | TNF-related apoptosis-induced ligand                         |
| TRANCE      | TNF-related activation-induced cytokine                      |
| TSLP        | Thymic stromal lymphopoietin                                 |
| TWEAK       | Tumor necrosis factor (Ligand) superfamily member 12         |
| uPA         | Urokinase-type plasminogen activator                         |
| VEGF-A      | Vascular endothelial growth factor A                         |
