# Supplementary material for: Patterns of Immune Activation in HIV and Non HIV Subjects and Its Relation to Cardiovascular Disease Risk
Source: PubMed Central journal article supplement (PMC8287326; doi:10.3389/fimmu.2021.647805), 2021-07-05
Supplement: DataSheet_2.pdf [file DataSheet_2.pdf]

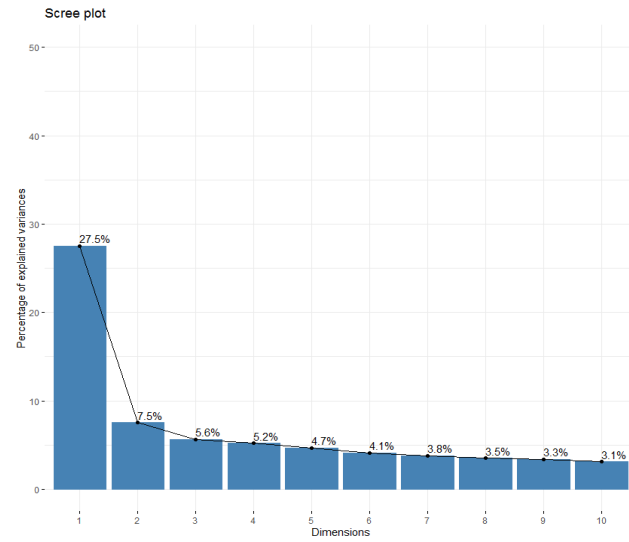

**Fig A.** Scree plot of a PCA including all immune markers.

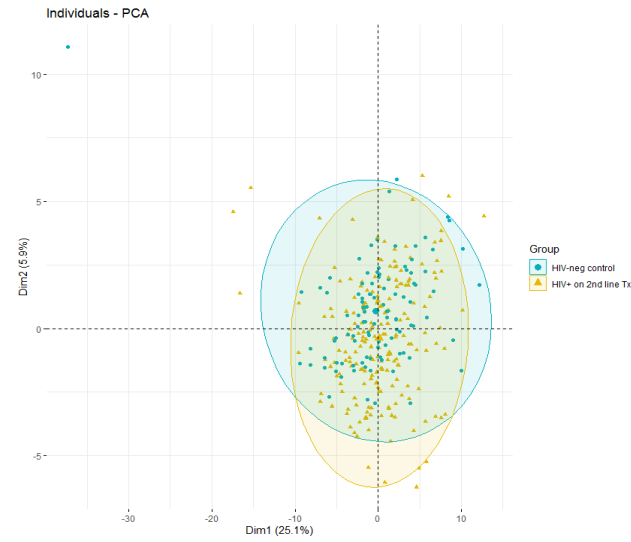

**Fig B.** PCA including all immune markers. Dimensions 1 & 2 according to HIV status.

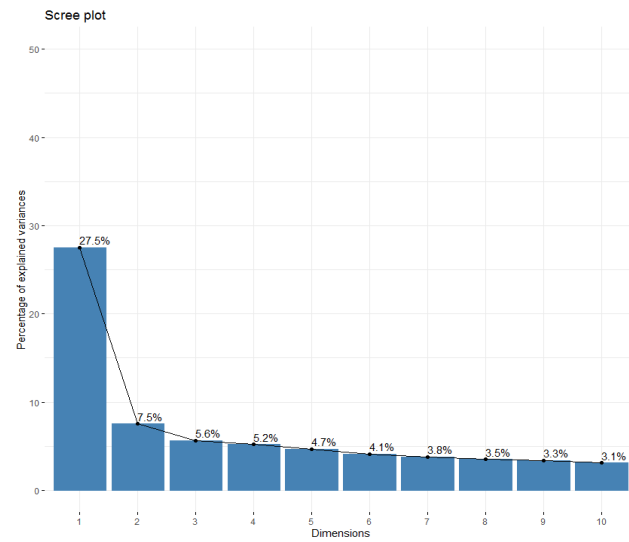

**Fig C.** Scree plot of a PCA including the top 30 immune markers with the most discriminatory power.

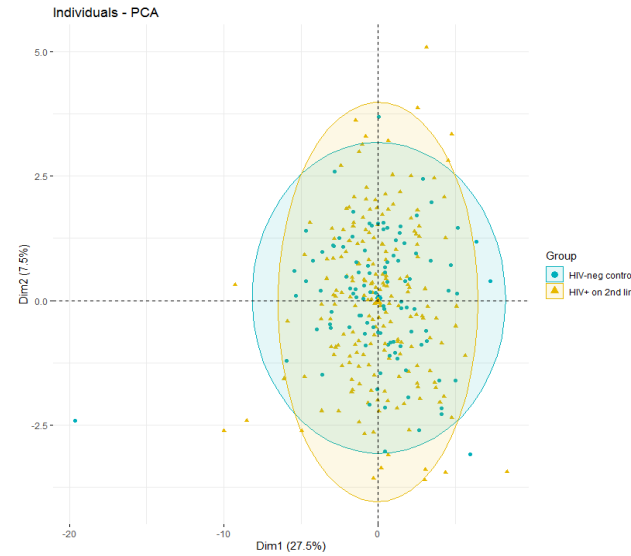

**Fig D.** PCA including the top 30 immune markers with the most discriminatory power. Dimensions 1 & 2 according to HIV status.

**Appendix 2. Figure A-D.** Principal component analysis by HIV status. PCA; principal component analysis, Tx; treatment.
