# Supplementary material for: Patterns of Immune Activation in HIV and Non HIV Subjects and Its Relation to Cardiovascular Disease Risk
Source: PubMed Central journal article supplement (PMC8287326; doi:10.3389/fimmu.2021.647805), 2021-07-05

Marker

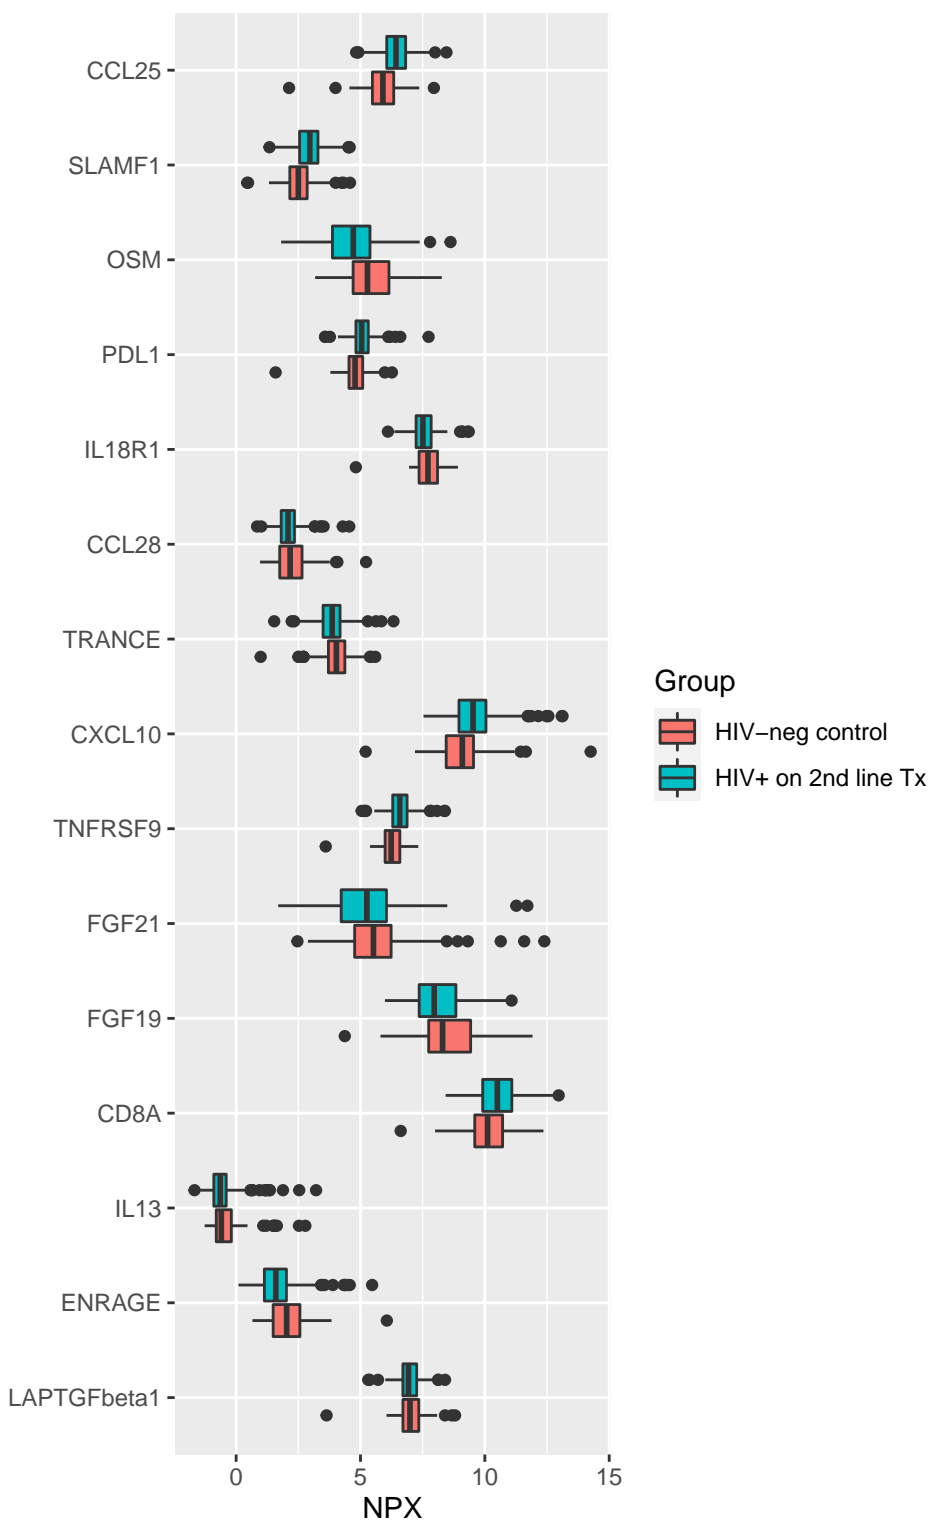

Supplement: DataSheet_3.pdf [file DataSheet_3.pdf]
