# Supplementary material for: Patterns of Immune Activation in HIV and Non HIV Subjects and Its Relation to Cardiovascular Disease Risk
Source: PubMed Central journal article supplement (PMC8287326; doi:10.3389/fimmu.2021.647805), 2021-07-05
Supplement: DataSheet_4.pdf [file DataSheet_4.pdf]

**Supplementary table. Immune markers in relation to HIV status.**

| <b>Immune markers</b> | <b>P</b> |
|-----------------------|----------|
| CCL25                 | <0.0001  |
| SLAMF1                | 0.0006   |
| OSM                   | 0.0006   |
| PDL1                  | 0.0006   |
| IL18R1                | 0.0016   |
| CCL28                 | 0.0247   |
| TRANCE                | 0.0461   |
| CXCL10                | 0.0461   |
| TNFRSF9               | 0.0461   |
| FGF21                 | 0.0545   |
| FGF19                 | 0.0547   |
| CD8A                  | 0.0577   |
| IL13                  | 0.0629   |
| EN-RAGE               | 0.0629   |
| LAPTGFbeta1           | 0.0703   |
| TGF-alpha             | 0.1032   |
| IL17C                 | 0.1128   |
| TNF                   | 0.1425   |
| CXCL9                 | 0.1706   |
| MCP1                  | 0.1981   |
| TNFSF14               | 0.1981   |
| IL12B                 | 0.1981   |
| 4E-BP1                | 0.1981   |
| ST1A1                 | 0.1981   |
| IL20                  | 0.2121   |
| SCF                   | 0.2265   |
| VEGFA                 | 0.2465   |
| IL18                  | 0.2465   |
| NT3                   | 0.2729   |
| IL8                   | 0.2979   |
| CCL11                 | 0.3007   |
| AXIN1                 | 0.3046   |
| TRAIL                 | 0.3331   |
| DNER                  | 0.3331   |
| IL1alpha              | 0.3678   |
| CD244                 | 0.3819   |
| CXCL1                 | 0.3819   |
| FGF23                 | 0.3827   |
| CD5                   | 0.3827   |
| CASP8                 | 0.3827   |
| TSLP                  | 0.4947   |
| CCL23                 | 0.4947   |
| CCL4                  | 0.5113   |
| MMP1                  | 0.5113   |
| IL24                  | 0.5113   |
| CX3CL1                | 0.5201   |

| <i>Continued</i> |        |
|------------------|--------|
| MCP2             | 0.5782 |
| IL7              | 0.6833 |
| IL5              | 0.6833 |
| CXCL11           | 0.6953 |
| CCL20            | 0.7122 |
| IL2              | 0.7234 |
| IL10RA           | 0.7724 |
| MCP4             | 0.7868 |
| IL6              | 0.8461 |
| CSF1             | 0.8482 |
| CXCL6            | 0.8583 |
| ARTN             | 0.8645 |
| CD6              | 0.8652 |
| STAMBP           | 0.8652 |
| IL2RB            | 0.8727 |
| TNFB             | 0.9010 |
| MCP3             | 0.9052 |
| IL15RA           | 0.9052 |
| IL22RA1          | 0.9052 |
| CXCL5            | 0.9052 |
| IL10             | 0.9052 |
| Flt3L            | 0.9052 |
| CD40             | 0.9052 |
| IFN-gamma        | 0.9052 |
| NRTN             | 0.9052 |
| TWEAK            | 0.9052 |
| OPG              | 0.9084 |
| IL17A            | 0.9271 |
| Beta-NGF         | 0.9295 |
| CDCP1            | 0.9451 |
| IL20RA           | 0.9451 |
| IL33             | 0.9451 |
| LIF              | 0.9451 |
| ADA              | 0.9451 |
| FGF5             | 0.9471 |
| IL4              | 0.9471 |
| uPA              | 0.9489 |
| CST5             | 0.9489 |
| LIFR             | 0.9489 |
| CCL19            | 0.9489 |
| IL10RB           | 0.9489 |
| HGF              | 0.9489 |
| MMP10            | 0.9489 |
| SIRT2            | 0.9489 |
| CCL3             | 0.9557 |
| GDNF             | 0.9795 |

# values adjusted for age, sex and current smoking, \*adjusted using the Benjamini & Hochberg false discovery rate
